# Supplementary material
Source: PubMed Central journal article supplement (PMC6256772)
Supplement: zac012187681s1.pdf [file zac012187681s1.pdf]

## 1 **Supplementary Material**

### 2 **Supplementary Material and Methods: Quantification of tobramycin and colistin**

3 *Calibrator and sample preparation:* Calibrators were prepared by spiking FAB medium with  
4 standard solutions of tobramycin and colistin. Calibrator concentrations ranged from 3.13  $\mu\text{M}$   
5 up to 50  $\mu\text{M}$  for tobramycin and from 1.56  $\mu\text{M}$  to 50  $\mu\text{M}$  for colistin A and B. Calibrators were  
6 stored in 30  $\mu\text{L}$  aliquots at  $-20^{\circ}\text{C}$ . 30  $\mu\text{L}$  of each sample and calibrator were treated with 30  $\mu\text{L}$   
7 of an internal standard solution (2.5  $\mu\text{M}$  streptomycin dissolved in acetonitrile). 10  $\mu\text{L}$  of this  
8 mixture were directly injected to the HPLC system.

9 *HPLC-MS/MS analysis:* Analysis of colistin and tobramycin was achieved using high  
10 performance liquid chromatography-coupled tandem mass spectrometry (HPLC-MS/MS).  
11 Chromatographic separation was performed using a Shimadzu system (Shimadzu, Duisburg,  
12 Germany), consisting of two HPLC-Pumps (LC-30AD), a temperature controlled autosampler  
13 (SIL-30AC), a degasser (DGU-20A5), oven (CTO-20AC) and a control unit (CBM-20A). A  
14 Nucleodur HILIC column (125 x 3 mm; 3  $\mu\text{m}$ ) was purchased from Macherey Nagel (Munich,  
15 Germany) and served as chromatographic column for analyte separation in HILIC mode.  
16 Mobile phases were 70/30 acetonitrile/water [v/v] (A) and 30/70 acetonitrile/water [v/v] (B),  
17 each containing 20 mM ammonium formate and 0.2 % formic acid. For chromatographic  
18 separation the column was kept at 40  $^{\circ}\text{C}$ . A gradient was applied increasing from 15 % B to  
19 100 % B within 9 minutes. 100 % B was hold for 2 minutes followed by a 5-minute column  
20 reequilibration time. The flow rate was set at 500  $\mu\text{L min}^{-1}$ .

21 Detection and quantification of colistin and tobramycin was carried out on a QTRAP®5500  
22 mass spectrometer (Sciex, Framingham, Massachusetts) equipped with an electrospray  
23 ionization source, operating in positive ionization mode. For SRM detection, the following  
24 mass transitions were identified: colistin A,  $[\text{M}+2\text{H}]_2^{2+}$ :  $m/z$  585.5  $\rightarrow$  241.1 (quantifier) and

25 m/z 585.5 → 223.2 (identifier); colistin B, [M+2H]<sup>2+</sup>: m/z 578.5 → 227.2 (quantifier) and m/z  
26 578.5 → 202.1 (identifier), tobramycin, [M+H]<sup>+</sup>: m/z 468.2 → 163.1 (quantifier) and m/z 468.2  
27 → 324.2 (identifier). Streptomycin ([M+H]<sup>+</sup>; m/z 582.3 → 263.2) served as internal standard  
28 for tobramycin as well as for colistin.

29 Control of the HPLC and MS/MS systems as well as data sampling is performed by Analyst  
30 software, version 1.5.2 (Sciex). Data interpretation of the MS/MS signals was carried out by  
31 calculating the ratios of the peak areas of the calibrators and samples in relation to the respective  
32 peak areas of the internal standard. For colistin the peak areas of the specific mass fragments  
33 from colistin A and B were summarized.

34

35

36 **Supplementary Table: extra file**

37

38 **Supplementary Figures**

39

40

41

42

43

44

45

46

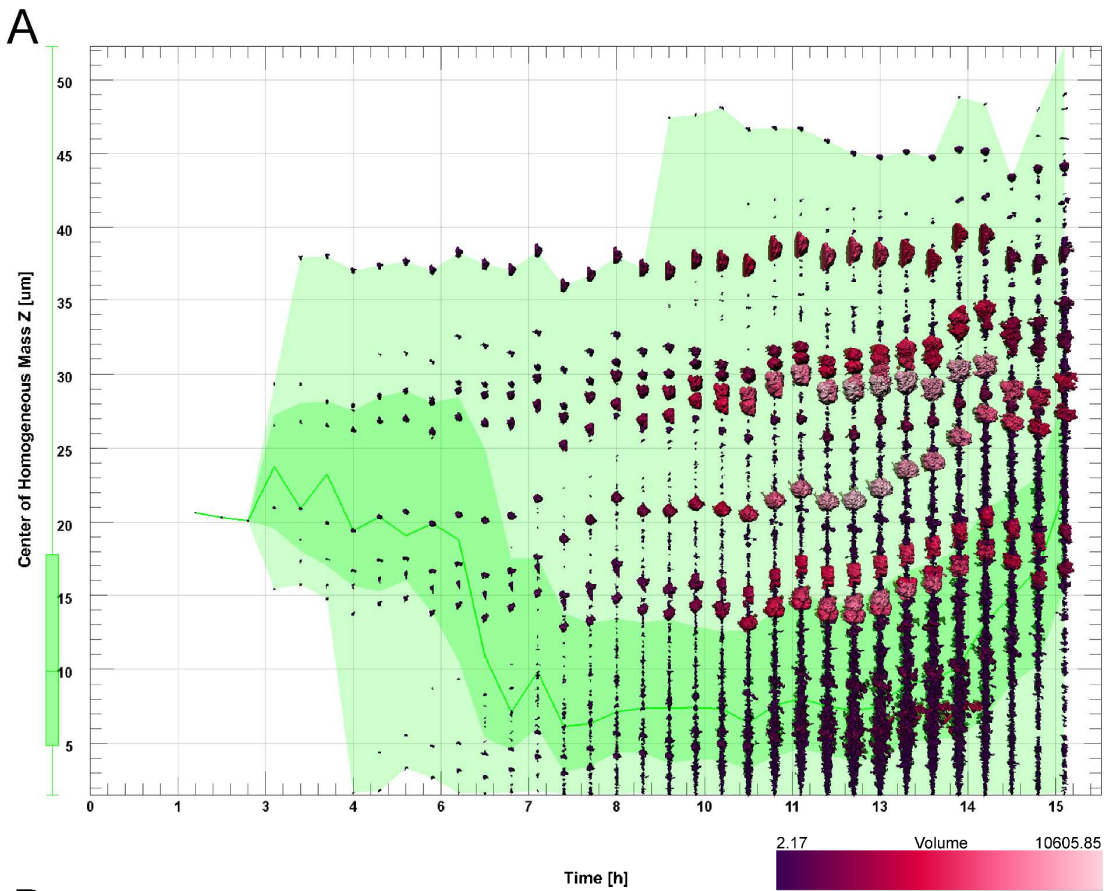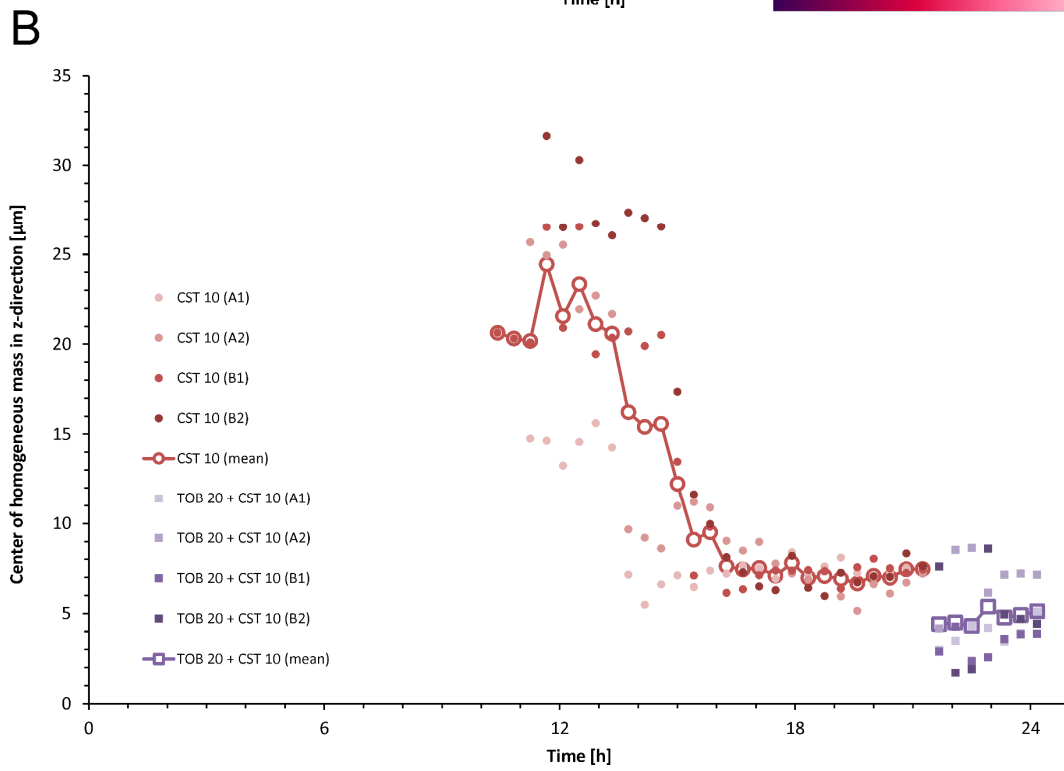

49 **Fig. S1. Determination of the z-position of regrowth cell clusters in 1 h-treated biofilms.**  
50 (a) Example for the change in the center of homogeneous mass (CHM) in z of regrowth cell  
51 clusters after colistin ( $10 \mu\text{g ml}^{-1}$ ) treatment plotted over time. The height of detected regrowing  
52 cells is estimated by the CHM in z-direction ( $0 \mu\text{m} = \text{substratum}$ ) of cells with strong GFP  
53 fluorescence. With increasing time, more and more dividing cells/clusters appear in the biofilm  
54 growing over time (visualized by the miniaturized isosurfaces, which increase in size  $\rightarrow$  pink  
55 color code). The mean CHM in z-direction is about  $20 \mu\text{m}$  for approx. 5 h and strongly drops  
56 to values below  $10 \mu\text{m}$  due a massive increase of cells close to the substratum. In (a), time point  
57 0 h at the x-axis is equivalent to the time point 8 h after biofilm treatment. (b) Summarized  
58 analysis of the CHM in z for 2 biological and 2 technical replicas of colistin and the combination  
59 of colistin and tobramycin. Tobramycin alone hardly gave rise to regrowth detectable via strong  
60 GFP fluorescence.

61

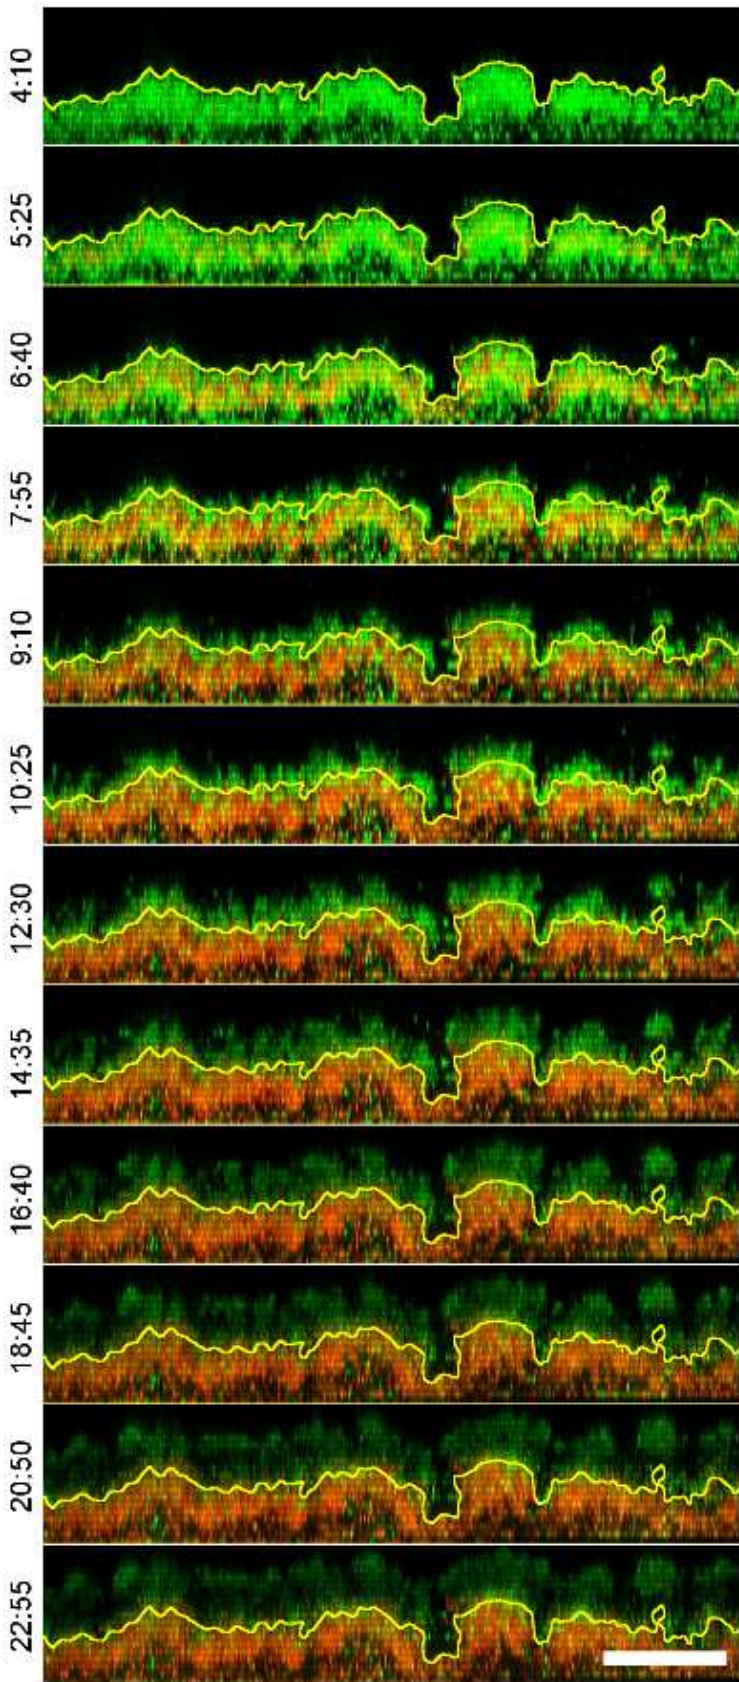

64 **Fig. S2: Killing pattern of a biofilm continuously treated with 2.5  $\mu\text{g ml}^{-1}$  colistin.** The  
65 biofilm was cultivated for 48 h before treatment. The yellow line within the xz-sectioning  
66 projection represents the biofilm surface at time point 4:10 h after antibiotic exposure. Bacterial  
67 killing starts below the outer layer, proceeding inwards and – with a slight delay – outwards  
68 towards the former surface layer (but not further). Green: GFP fluorescence, red: PI  
69 fluorescence. Scale bar 50  $\mu\text{m}$ .

70

71 **Figure S3**

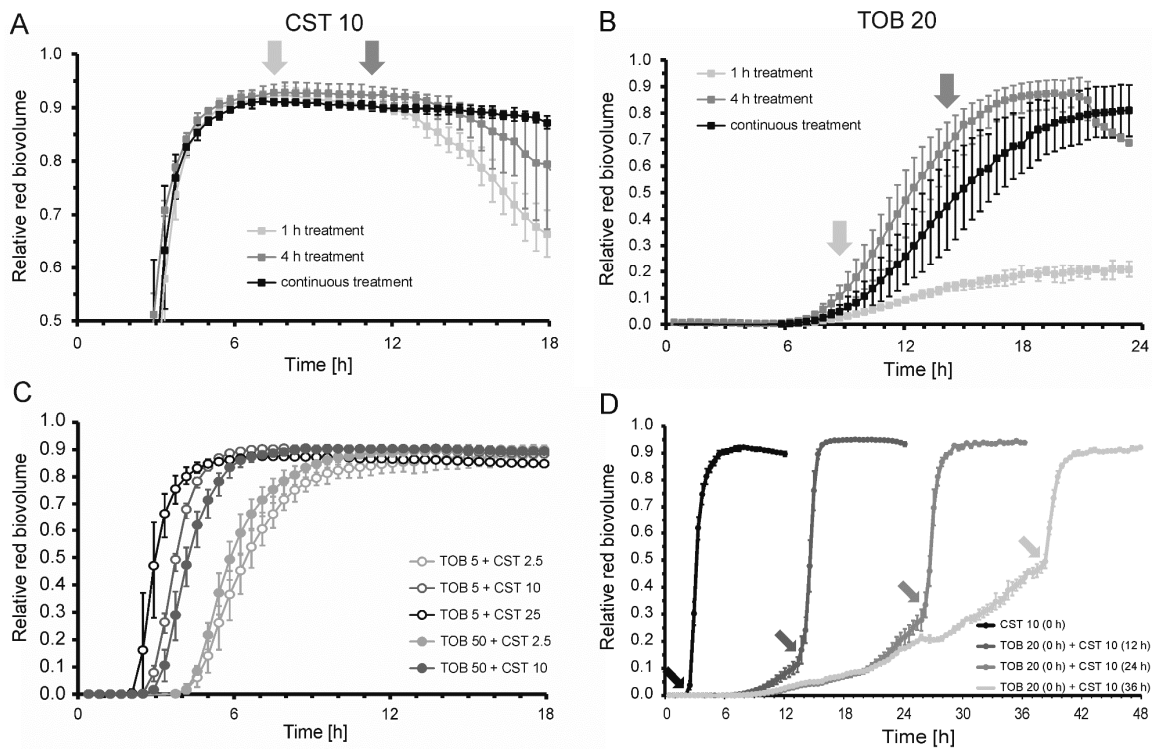

72

73 **Fig. S3. Killing and regrowth kinetics of 48 h-old PA14 biofilms after variation in**  
 74 **antibiotic exposure, combination and sequence.** (a-b) Biofilms were exposed to (a)  $10 \mu\text{g ml}^{-1}$   
 75  $1$  colistin or (b)  $20 \mu\text{g ml}^{-1}$  tobramycin for 1 h, 4 h and continuously. Arrows indicate the time  
 76 point of regrowth. (c) Biofilms are continuously treated with combinations of colistin (CST)  
 77 and tobramycin (TOB) at given concentrations (in  $\mu\text{g ml}^{-1}$ ). Variation of colistin concentration  
 78 stronger affects killing curve progression than variation in tobramycin concentration. (d)  
 79 Biofilms were exposed to  $10 \mu\text{g ml}^{-1}$  colistin after no (black), 12 h (dark grey), 24 h (grey) and  
 80 36 h (light grey) pretreatment with  $20 \mu\text{g ml}^{-1}$  tobramycin. Antibiotics were given for 1 h in a  
 81 12 h interval. Arrows indicate the time point when colistin killing is getting visible. Colistin  
 82 killing is not influenced by tobramycin pretreatment. Data are mean  $\pm$  standard deviation of  
 83 two positions in two independent experiments ( $n = 4$ ), respectively two technical replicas (2  
 84 positions within one lane) for part d. Data of biofilms treated for 4 h / continuously have already  
 85 been shown in parts in Fig. 2.

86 **Figure S4**

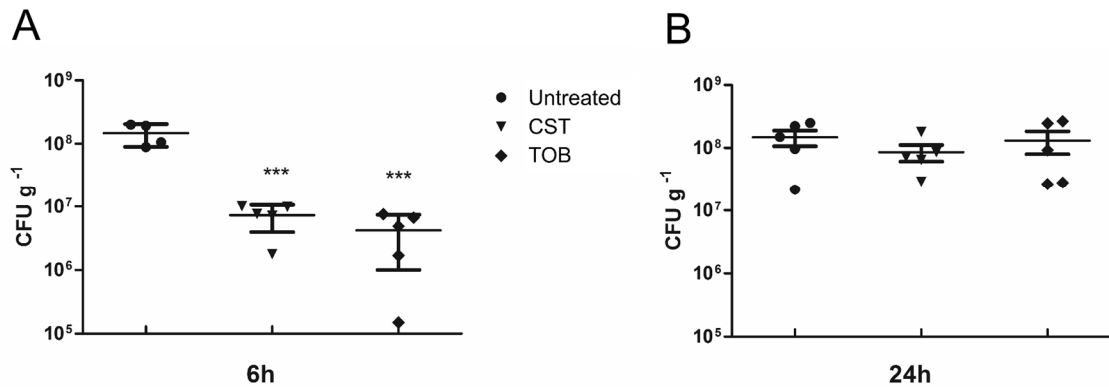

87

88 **Fig. S4. *In vivo* regrowth of biofilm cells following antibiotic exposure.** CFU counts 6 h (a)  
 89 and 24 h (b) after intra-tumoral injection of 20 mg kg<sup>-1</sup> tobramycin or 20 mg kg<sup>-1</sup> colistin,  
 90 (n = 5).

91 **Figure S5**

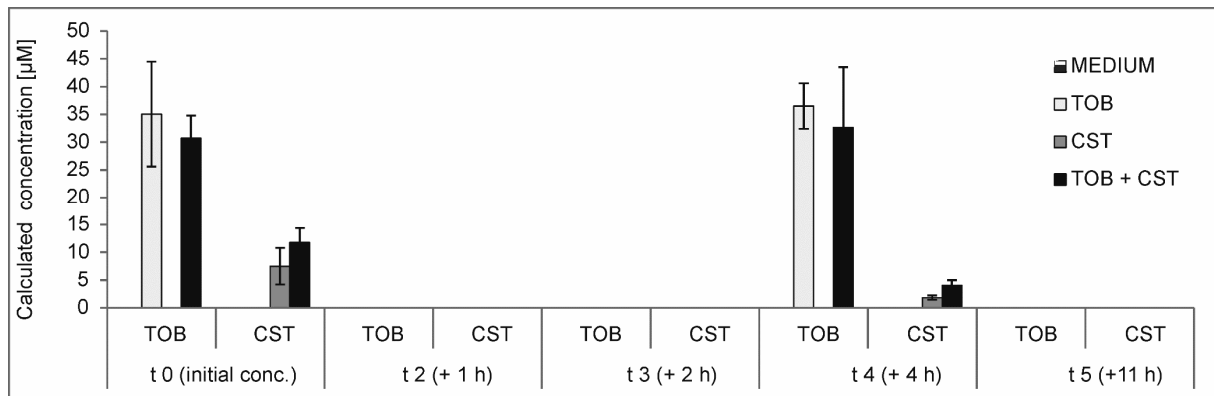

92

93 **Fig. S5. Antibiotic concentrations in the flow through of treated biofilms.** Samples were  
 94 collected 1 h, 2 h, 4 h and 11 h after flow restart at the outlet tube (approx. 150 cm behind the  
 95 flow cell). Both antibiotics could be detected at time point t4, 4 h after injection into the system.  
 96 Samples of medium (non-treated) (black and white), tobramycin (white), colistin (grey) and a  
 97 combination treatment (black) were analyzed via HPLC and mass spectrometry. n = 2  
 98 (biological replica).



99 **Supplementary Movie legends**

100 **Video S1. Video sequences of various antibiotic treatments.** Biofilms were cultivated for  
101 48 h and treated for a period of 1 h (A, D), 4 h (E-J) or continuously (K-P) with 2.5, 10 and  
102 25  $\mu\text{g ml}^{-1}$  colistin, 5, 20 and 50  $\mu\text{g ml}^{-1}$  tobramycin, and 70 % EtOH (B) (killing control).  
103 Video sequences contain biofilm-sectioning projections, which have been acquired every 25  
104 minutes over a period of 24 h. Green: GFP fluorescence, red: PI fluorescence. Scale bar 50  $\mu\text{m}$ .

105 **Video S2. Exemplary visualization of the isosurface generation with the software Imaris**  
106 **for the analysis of biofilm regrowth.** The Biofilm was cultivated for 48 h and treated for a  
107 period of 4 h with 50  $\mu\text{g ml}^{-1}$  tobramycin. The video sequence contains biofilm 3D maximum  
108 intensity projections, which have been acquired every 25 minutes over a period of 24 h. Green:  
109 GFP fluorescence, red: PI fluorescence. Grey: Isosurface of the regrown population (strong  
110 GFP signal).

111 **Video S3. Visualization of the top layer growth despite antibiotic exposure.** The Biofilm  
112 was cultivated for 48 h and treated continuously with 2.5  $\mu\text{g ml}^{-1}$  colistin. The video sequence  
113 contains a biofilm 3D maximum intensity projections, which has been acquired every 25  
114 minutes over a period of 24 h. Green: GFP fluorescence, red: PI fluorescence.

115 **Video S4. Comparison of two treatment regimens against in vitro biofilms.** Biofilms were  
116 cultivated for 48 h and four times exposed for 1 h to 10  $\mu\text{g ml}^{-1}$  colistin, 20  $\mu\text{g ml}^{-1}$  tobramycin  
117 or a combination of both in two treatment intervals: the first set was treated every 8 h and the  
118 second set every 12 h. Video sequences contain biofilm-sectioning projections, which have  
119 been acquired every 25 minutes over a period of 48 h. Green: GFP fluorescence, red: PI  
120 fluorescence. Scale bar 50  $\mu\text{m}$ .

121

Table S1: Summary of killing curve analysis

|            | Sample                               | replica     | 1% killing*       |      | 5% killing        |      | 50% killing        |      | IC50              |      | Half Y |      | slope |      | Max Killing†    | Start of Regrowth     | BAI‡ |       | Doubling Time (isosurface) |      |      |
|------------|--------------------------------------|-------------|-------------------|------|-------------------|------|--------------------|------|-------------------|------|--------|------|-------|------|-----------------|-----------------------|------|-------|----------------------------|------|------|
| exposure   | antibiotic [ $\mu\text{g ml}^{-1}$ ] | biol + tech | $t_{\text{eff}1}$ | SD   | $t_{\text{eff}5}$ | SD   | $t_{\text{eff}50}$ | SD   | $t_{\text{IC}50}$ | SD   | mean   | SD   | mean  | SD   | % red biovolume | $t_{\text{regrowth}}$ | mean | SD    | mean                       | SD   |      |
| 1 h        | TOB 20                               | 2+2         | 7.66              | 0.15 | 10.22             | 0.23 | no                 |      | 13.12             | 0.39 | 0.12   | 0.01 | 0.19  | 0.01 | 23%             | 8.54                  | 0.47 | 0.89  | 0.41                       | 2.49 | 1.72 |
|            | CST 10                               | 2+2         | 2.16              | 0.02 | 2.45              | 0.07 | 3.22               | 0.12 | 3.17              | 0.12 | 0.46   | 0.00 | 1.24  | 0.07 | 92%             | 7.50                  | 0.42 | 5.34  | 0.41                       | 1.46 | 0.19 |
|            | TOB 20 + CST 10                      | 2+2         | 1.66              | 0.07 | 1.90              | 0.06 | 3.09               | 0.09 | 3.01              | 0.09 | 0.46   | 0.00 | 0.84  | 0.02 | 93%             | 10.73                 | 0.62 | 9.07  | 0.62                       | 0.93 | 0.10 |
| 4 h        | TOB 5                                | 2+2         | 10.72             | 0.86 | 15.95             | 0.89 | no                 |      | 20.00             | 1.06 | 0.11   | 0.02 | 0.10  | 0.01 | 22%             | 10.83                 | 0.00 | 0.44  | 0.46                       | 2.70 | 0.80 |
|            | TOB 10                               | 1+1         | 8.27              | 0.56 | 10.27             | 0.02 | no                 |      | 14.06             | 0.17 | 0.23   | 0.00 | 0.23  | 0.01 | 45%             | 14.79                 | 0.21 | 6.52  | 0.35                       | 3.61 | 1.48 |
|            | TOB 20                               | 2+2         | 6.50              | 0.24 | 7.93              | 0.39 | 12.39              | 0.88 | 11.86             | 0.65 | 0.44   | 0.03 | 0.26  | 0.01 | 88%             | 14.17                 | 0.93 | 7.67  | 0.79                       | 1.19 | 0.16 |
|            | TOB 50                               | 2+2         | 5.51              | 0.54 | 6.68              | 0.42 | 11.50              | 0.39 | 10.64             | 0.18 | 0.42   | 0.03 | 0.23  | 0.01 | 84%             | 16.25                 | 3.76 | 10.74 | 3.43                       | 1.62 | 0.57 |
|            | CST 1                                | 1+1         | 10.18             | 0.79 | 14.21             | 0.44 | no                 |      | 16.54             | 0.45 | 0.08   | 0.01 | 0.17  | 0.01 | 17%             | g.d.                  |      | n.d.  |                            | n.d. |      |
|            | CST 2.5                              | 3+3         | 4.02              | 0.21 | 4.54              | 0.24 | 6.10               | 0.31 | 5.82              | 0.25 | 0.42   | 0.04 | 0.80  | 0.06 | 83%             | 8.10                  | 0.21 | 1.45  | 2.05                       | n.d. |      |
|            | CST 5                                | 1+1         | 2.80              | 0.20 | 2.96              | 0.01 | 3.74               | 0.02 | 3.74              | 0.02 | 0.49   | 0.00 | 1.70  | 0.13 | 99%             | 7.08                  | 0.00 | 4.24  | 0.11                       | 1.07 | 0.00 |
|            | CST 10                               | 2+2         | 2.02              | 0.16 | 2.25              | 0.16 | 3.08               | 0.19 | 3.00              | 0.16 | 0.45   | 0.01 | 1.24  | 0.05 | 90%             | 10.52                 | 1.31 | 8.50  | 1.27                       | 0.98 | 0.02 |
|            | CST 25                               | 2+2         | 1.25              | 0.04 | 1.35              | 0.03 | 2.03               | 0.05 | 1.99              | 0.05 | 0.47   | 0.00 | 1.00  | 0.05 | 94%             | 15.31                 | 0.62 | 14.07 | 0.62                       | 0.99 | 0.24 |
|            | TOB 5 + CST 2.5                      | 2+2         | 3.84              | 0.38 | 4.38              | 0.51 | 7.47               | 1.68 | 6.28              | 0.75 | 0.39   | 0.05 | 0.51  | 0.10 | 78%             | 12.09                 | 1.14 | 8.45  | 1.08                       | 1.24 | 0.08 |
|            | TOB 20 + CST 10                      | 2+2         | 2.51              | 0.05 | 3.00              | 0.10 | 4.76               | 0.19 | 4.55              | 0.19 | 0.43   | 0.01 | 0.69  | 0.02 | 86%             | 21.67                 | 0.00 | 19.16 | 0.05                       | 0.68 | 0.07 |
|            | 70% EtOH                             | 2+2         | 1.25              | 0.00 | 1.27              | 0.00 | 1.46               | 0.00 | 1.46              | 0.00 | 0.50   | 0.00 | n.d.  |      | 99%             | n.d.                  |      | n.d.  |                            | n.d. |      |
| continuous | TOB 2                                | 2+2         | no                |      | no                |      | no                 |      | no                |      | no     |      | 0.14  | 0.03 | n.d.            | g.d.                  |      | n.d.  |                            | n.d. |      |
|            | TOB 5                                | 3+3         | 13.50             | 1.26 | 16.18             | 1.40 | 24.20              | 0.95 | 20.57             | 0.54 | 0.21   | 0.03 | 0.17  | 0.02 | 42%             | n.d.                  |      | n.d.  |                            | n.d. |      |
|            | TOB 20                               | 2+2         | 7.21              | 0.35 | 8.96              | 0.61 | 14.84              | 1.54 | 13.80             | 0.96 | 0.41   | 0.04 | 0.20  | 0.01 | 81%             | n.d.                  |      | n.d.  |                            | n.d. |      |
|            | TOB 50                               | 3+3         | 5.62              | 0.32 | 7.12              | 0.52 | 13.61              | 1.40 | 12.13             | 1.02 | 0.39   | 0.03 | 0.18  | 0.01 | 78%             | n.d.                  |      | n.d.  |                            | n.d. |      |
|            | CST 0.5                              | 2+2         | 17.35             | 2.82 | 18.54             | 1.55 | no                 |      | 20.11             | 0.94 | 0.04   | 0.03 | 0.19  | 0.06 | 8%              | g.d.                  |      | n.d.  |                            | n.d. |      |
|            | CST 1                                | 2+2         | 8.93              | 0.32 | 10.31             | 0.20 | 18.33              | 1.75 | 13.64             | 0.23 | 0.30   | 0.02 | 0.23  | 0.01 | 60%             | g.d.                  |      | n.d.  |                            | n.d. |      |
|            | CST 2.5                              | 3+3         | 3.88              | 0.66 | 4.73              | 0.51 | 7.15               | 0.55 | 6.59              | 0.40 | 0.38   | 0.02 | 0.54  | 0.03 | 76%             | g.d.                  |      | n.d.  |                            | n.d. |      |
|            | CST 10                               | 2+2         | 2.30              | 0.24 | 2.43              | 0.28 | 3.05               | 0.26 | 3.00              | 0.27 | 0.46   | 0.00 | 1.22  | 0.10 | 91%             | n.d.                  |      | n.d.  |                            | n.d. |      |
|            | CST 25                               | 2+2         | 1.91              | 0.18 | 2.04              | 0.11 | 2.54               | 0.10 | 2.46              | 0.08 | 0.44   | 0.01 | 1.64  | 0.10 | 88%             | n.d.                  |      | n.d.  |                            | n.d. |      |
|            | TOB 5 + CST 2.5                      | 5+5         | 4.06              | 0.18 | 4.50              | 0.15 | 6.51               | 0.21 | 6.21              | 0.17 | 0.45   | 0.01 | 0.48  | 0.01 | 89%             | 15.00                 | 1.98 | 10.94 | 2.07                       | 1.46 | 0.26 |
|            | TOB 5 + CST 10                       | 2+2         | 2.55              | 0.03 | 2.78              | 0.09 | 3.77               | 0.05 | 3.68              | 0.04 | 0.45   | 0.00 | 1.06  | 0.02 | 91%             | n.d.                  |      | n.d.  |                            | n.d. |      |
|            | TOB 5 + CST 25                       | 2+2         | 2.14              | 0.16 | 2.32              | 0.17 | 2.97               | 0.20 | 2.87              | 0.20 | 0.44   | 0.00 | 1.28  | 0.08 | 87%             | n.d.                  |      | n.d.  |                            | n.d. |      |
|            | TOB 50 + CST 2.5                     | 2+2         | 3.98              | 0.02 | 4.39              | 0.06 | 5.88               | 0.23 | 5.69              | 0.19 | 0.45   | 0.01 | 0.58  | 0.02 | 90%             | n.d.                  |      | n.d.  |                            | n.d. |      |
|            | TOB 50 + CST 10                      | 2+2         | 2.78              | 0.13 | 3.13              | 0.15 | 4.25               | 0.16 | 4.12              | 0.15 | 0.45   | 0.00 | 0.81  | 0.03 | 91%             | n.d.                  |      | n.d.  |                            | n.d. |      |

\* Start of antibiotic activity; † Maximal killing = 2\* Half Y; ‡ Biofilm Active Interval; n.d. not detectable; g.d. growth detectable despite treatment; italic: not determined in all samples
